# Supplementary material for: The Embedding Problem for Markov Models of Nucleotide Substitution
Source: PubMed Central journal article supplement (PMC3728303; doi:10.1371/journal.pone.0069187), 2013-07-30
Supplement: pone.0069187.s001.pdf [file pone.0069187.s001.pdf]

# Appendix A

## Finding a valid Q

Estimation of a valid Q from non-embeddable P matrices ( $P_{NE}$ ) was done using a constrained optimisation procedure. The number of free parameters for any  $\vec{Q}$  matrix was 12, equating to the number of off-diagonal elements of  $\vec{Q}$ ,  $q_{ij}, i \neq j$ . This was because the diagonal elements were constrained to be  $q_{ii} = -\sum_{j, j \neq i} q_{ij}$  to ensure that the row sums of  $\vec{Q}$  were 0. The off-diagonals were constrained to be positive to ensure a valid  $\vec{Q}$ ,  $q_{ij}, i \neq j \geq 0$ . The Frobenius norm was then used to find the nearest valid  $\vec{Q}$ . The Frobenius norm is the matrix norm of a  $m \times n$  matrix defined as the square root of the sum of the absolute squares of its elements and is a measure of the effective size of a matrix given its elements e.g. for a matrix A the Frobenius Norm is:

$$\|\vec{A}\|_F = \sqrt{\sum_{i=1}^m \sum_{j=1}^n |a_{ij}|^2} \quad (1)$$

Thus to find the nearest valid  $\vec{Q}$ ,  $\|\vec{P}_{NE} - \exp(\vec{Q})\|_F$  was minimised using optimisation procedures in PyCogent. The matrix exponential was computed by Pade.
